# Supplementary material for: Potential therapeutic impact of CD13 expression in non-small cell lung cancer
Source: PubMed Central journal article supplement (PMC5467809; doi:10.1371/journal.pone.0177146), 2017-06-12

# Raw data: NSCLC Study Collective; CD13 expression

| #  | CD13 Stroma | CD13 Tumor | Age  | Sex    | ECOG   | Squamous cell carcinoma | Adenocarcinoma |
|----|-------------|------------|------|--------|--------|-------------------------|----------------|
| 1  | negative    | negative   | 87,6 | male   | ECOG 2 | no SCC                  | no ACA         |
| 2  | negative    | negative   | 62,4 | male   | ECOG 2 | no SCC                  | Adenocarcinoma |
| 3  | negative    | negative   | 68,3 | male   | ECOG 2 | no SCC                  | Adenocarcinoma |
| 4  | negative    | positive   | 67,2 | male   | ECOG 2 | Squamous cell carcinoma | no ACA         |
| 5  | positive    | negative   | 74,4 | male   | ECOG 2 | Squamous cell carcinoma | no ACA         |
| 6  | negative    | negative   | 58,3 | male   | ECOG 2 | Squamous cell carcinoma | no ACA         |
| 7  | negative    | negative   | 72,9 | female | ECOG 2 | Squamous cell carcinoma | no ACA         |
| 8  | negative    | negative   | 71,4 | male   | ECOG 2 | Squamous cell carcinoma | no ACA         |
| 9  | negative    | negative   | 76,7 | male   | ECOG 2 | Squamous cell carcinoma | no ACA         |
| 10 | negative    | negative   | 79   | male   | ECOG 2 | no SCC                  | Adenocarcinoma |
| 11 | negative    | negative   | 69,3 | male   | ECOG 2 | Squamous cell carcinoma | no ACA         |
| 12 | negative    | negative   | 76,5 | male   | ECOG 2 | no SCC                  | Adenocarcinoma |
| 13 | negative    | negative   | 65,2 | male   | ECOG 2 | Squamous cell carcinoma | no ACA         |
| 14 | negative    | negative   | 82,4 | male   | ECOG 2 | Squamous cell carcinoma | no ACA         |
| 15 | positive    | positive   | 76,9 | female | ECOG 1 | no SCC                  | no ACA         |
| 16 | negative    | positive   | 73,7 | male   | ECOG 1 | no SCC                  | no ACA         |
| 17 | positive    | negative   | 74,4 | male   | ECOG 1 | no SCC                  | no ACA         |
| 18 | positive    | negative   | 66,4 | female | ECOG 1 | no SCC                  | no ACA         |
| 19 | positive    | negative   | 71,8 | male   | ECOG 1 | no SCC                  | no ACA         |
| 20 | negative    | negative   | 69,6 | male   | ECOG 1 | no SCC                  | no ACA         |
| 21 | negative    | negative   | 77,1 | male   | ECOG 1 | no SCC                  | no ACA         |
| 22 | negative    | negative   | 72,6 | female | ECOG 1 | no SCC                  | no ACA         |
| 23 | negative    | negative   | 54,9 | female | ECOG 1 | no SCC                  | no ACA         |
| 24 | negative    | negative   | 61,8 | female | ECOG 1 | no SCC                  | no ACA         |
| 25 | negative    | negative   | 74,6 | male   | ECOG 1 | no SCC                  | no ACA         |
| 26 | negative    | negative   | 67,3 | male   | ECOG 1 | no SCC                  | no ACA         |
| 27 | negative    | negative   | 68,4 | male   | ECOG 1 | no SCC                  | no ACA         |
| 28 | negative    | negative   | 64,7 | male   | ECOG 1 | no SCC                  | no ACA         |
| 29 | negative    | negative   | 70,1 | female | ECOG 1 | no SCC                  | no ACA         |
| 30 | negative    | negative   | 66   | male   | ECOG 1 | no SCC                  | no ACA         |
| 31 | negative    | negative   | 57,6 | male   | ECOG 1 | no SCC                  | no ACA         |
| 32 | negative    | negative   | 70,9 | male   | ECOG 1 | no SCC                  | no ACA         |
| 33 | negative    | negative   | 70,2 | male   | ECOG 1 | no SCC                  | no ACA         |
| 34 | negative    | negative   | 66,4 | male   | ECOG 1 | no SCC                  | no ACA         |
| 35 | negative    | negative   | 60,4 | male   | ECOG 1 | no SCC                  | no ACA         |
| 36 | negative    | negative   | 68,7 | male   | ECOG 1 | no SCC                  | no ACA         |
| 37 | negative    | negative   | 66,1 | female | ECOG 1 | no SCC                  | no ACA         |
| 38 | positive    | positive   | 51,8 | male   | ECOG 1 | no SCC                  | Adenocarcinoma |
| 39 | negative    | positive   | 70,5 | male   | ECOG 1 | no SCC                  | Adenocarcinoma |
| 40 | negative    | positive   | 57,5 | male   | ECOG 1 | no SCC                  | Adenocarcinoma |
| 41 | negative    | positive   | 67,4 | male   | ECOG 1 | no SCC                  | Adenocarcinoma |
| 42 | negative    | positive   | 64,5 | male   | ECOG 1 | no SCC                  | Adenocarcinoma |
| 43 | negative    | positive   | 48,4 | female | ECOG 1 | no SCC                  | Adenocarcinoma |
| 44 | negative    | positive   | 43,6 | female | ECOG 1 | no SCC                  | Adenocarcinoma |
| 45 | positive    | negative   | 60,7 | male   | ECOG 1 | no SCC                  | Adenocarcinoma |
| 46 | positive    | negative   | 67,9 | male   | ECOG 1 | no SCC                  | Adenocarcinoma |

|    |          |          |      |        |        |        |                |
|----|----------|----------|------|--------|--------|--------|----------------|
| 47 | positive | negative | 65,1 | male   | ECOG 1 | no SCC | Adenocarcinoma |
| 48 | positive | negative | 78,7 | male   | ECOG 1 | no SCC | Adenocarcinoma |
| 49 | negative | negative | 64,5 | male   | ECOG 1 | no SCC | Adenocarcinoma |
| 50 | negative | negative | 62,1 | male   | ECOG 1 | no SCC | Adenocarcinoma |
| 51 | negative | negative | 68,6 | male   | ECOG 1 | no SCC | Adenocarcinoma |
| 52 | negative | negative | 64,3 | male   | ECOG 1 | no SCC | Adenocarcinoma |
| 53 | negative | negative | 71   | male   | ECOG 1 | no SCC | Adenocarcinoma |
| 54 | negative | negative | 73   | male   | ECOG 1 | no SCC | Adenocarcinoma |
| 55 | negative | negative | 69,7 | male   | ECOG 1 | no SCC | Adenocarcinoma |
| 56 | negative | negative | 61,7 | male   | ECOG 1 | no SCC | Adenocarcinoma |
| 57 | negative | negative | 64,4 | male   | ECOG 1 | no SCC | Adenocarcinoma |
| 58 | negative | negative | 60,4 | female | ECOG 1 | no SCC | Adenocarcinoma |
| 59 | negative | negative | 44,3 | male   | ECOG 1 | no SCC | Adenocarcinoma |
| 60 | negative | negative | 71,1 | male   | ECOG 1 | no SCC | Adenocarcinoma |
| 61 | negative | negative | 61,5 | male   | ECOG 1 | no SCC | Adenocarcinoma |
| 62 | negative | negative | 48,2 | female | ECOG 1 | no SCC | Adenocarcinoma |
| 63 | negative | negative | 69,2 | male   | ECOG 1 | no SCC | Adenocarcinoma |
| 64 | negative | negative | 40,6 | male   | ECOG 1 | no SCC | Adenocarcinoma |
| 65 | negative | negative | 74,4 | male   | ECOG 1 | no SCC | Adenocarcinoma |
| 66 | negative | negative | 64,6 | male   | ECOG 1 | no SCC | Adenocarcinoma |
| 67 | negative | negative | 75,3 | male   | ECOG 1 | no SCC | Adenocarcinoma |
| 68 | negative | negative | 66,1 | female | ECOG 1 | no SCC | Adenocarcinoma |
| 69 | negative | negative | 54,6 | female | ECOG 1 | no SCC | Adenocarcinoma |
| 70 | negative | negative | 72,5 | male   | ECOG 1 | no SCC | Adenocarcinoma |
| 71 | negative | negative | 52,4 | male   | ECOG 1 | no SCC | Adenocarcinoma |
| 72 | negative | negative | 57,3 | female | ECOG 1 | no SCC | Adenocarcinoma |
| 73 | negative | negative | 65,7 | male   | ECOG 1 | no SCC | Adenocarcinoma |
| 74 | negative | negative | 62,3 | male   | ECOG 1 | no SCC | Adenocarcinoma |
| 75 | negative | negative | 70,4 | female | ECOG 1 | no SCC | Adenocarcinoma |
| 76 | negative | negative | 64,2 | male   | ECOG 1 | no SCC | Adenocarcinoma |
| 77 | negative | negative | 61,7 | male   | ECOG 1 | no SCC | Adenocarcinoma |
| 78 | negative | negative | 58,7 | male   | ECOG 1 | no SCC | Adenocarcinoma |
| 79 | negative | negative | 78,1 | male   | ECOG 1 | no SCC | Adenocarcinoma |
| 80 | negative | negative | 77,6 | female | ECOG 1 | no SCC | Adenocarcinoma |
| 81 | negative | negative | 72,8 | female | ECOG 1 | no SCC | Adenocarcinoma |
| 82 | negative | negative | 67,6 | female | ECOG 1 | no SCC | Adenocarcinoma |
| 83 | negative | negative | 69,7 | female | ECOG 1 | no SCC | Adenocarcinoma |
| 84 | negative | negative | 63,4 | female | ECOG 1 | no SCC | Adenocarcinoma |
| 85 | negative | negative | 75,2 | male   | ECOG 1 | no SCC | Adenocarcinoma |
| 86 | negative | negative | 66   | male   | ECOG 1 | no SCC | Adenocarcinoma |
| 87 | negative | negative | 67,6 | male   | ECOG 1 | no SCC | Adenocarcinoma |
| 88 | negative | negative | 52,3 | male   | ECOG 1 | no SCC | Adenocarcinoma |
| 89 | negative | negative | 64,1 | male   | ECOG 1 | no SCC | Adenocarcinoma |
| 90 | negative | negative | 66,7 | female | ECOG 1 | no SCC | Adenocarcinoma |
| 91 | negative | negative | 71,9 | male   | ECOG 1 | no SCC | Adenocarcinoma |
| 92 | negative | negative | 72,1 | female | ECOG 1 | no SCC | Adenocarcinoma |
| 93 | negative | negative | 72,4 | female | ECOG 1 | no SCC | Adenocarcinoma |
| 94 | negative | negative | 70,6 | female | ECOG 1 | no SCC | Adenocarcinoma |
| 95 | negative | negative | 72,2 | male   | ECOG 1 | no SCC | Adenocarcinoma |
| 96 | negative | negative | 76,1 | female | ECOG 1 | no SCC | Adenocarcinoma |

|     |          |          |      |        |        |                         |                |
|-----|----------|----------|------|--------|--------|-------------------------|----------------|
| 97  | negative | negative | 65   | male   | ECOG 1 | no SCC                  | Adenocarcinoma |
| 98  | negative | positive | 65,1 | male   | ECOG 1 | Squamous cell carcinoma | no ACA         |
| 99  | negative | positive | 62,1 | male   | ECOG 1 | Squamous cell carcinoma | no ACA         |
| 100 | positive | negative | 59,3 | male   | ECOG 1 | Squamous cell carcinoma | no ACA         |
| 101 | positive | negative | 54,2 | male   | ECOG 1 | Squamous cell carcinoma | no ACA         |
| 102 | positive | negative | 65,2 | female | ECOG 1 | Squamous cell carcinoma | no ACA         |
| 103 | positive | negative | 62,3 | male   | ECOG 1 | Squamous cell carcinoma | no ACA         |
| 104 | positive | negative | 78,6 | male   | ECOG 1 | Squamous cell carcinoma | no ACA         |
| 105 | positive | negative | 58,7 | male   | ECOG 1 | Squamous cell carcinoma | no ACA         |
| 106 | positive | negative | 67,5 | male   | ECOG 1 | Squamous cell carcinoma | no ACA         |
| 107 | positive | negative | 58,2 | male   | ECOG 1 | Squamous cell carcinoma | no ACA         |
| 108 | positive | negative | 74,2 | male   | ECOG 1 | Squamous cell carcinoma | no ACA         |
| 109 | positive | negative | 51,8 | male   | ECOG 1 | Squamous cell carcinoma | no ACA         |
| 110 | positive | negative | 76,4 | male   | ECOG 1 | Squamous cell carcinoma | no ACA         |
| 111 | negative | negative | 64,5 | male   | ECOG 1 | Squamous cell carcinoma | no ACA         |
| 112 | negative | negative | 58,5 | male   | ECOG 1 | Squamous cell carcinoma | no ACA         |
| 113 | negative | negative | 68,9 | male   | ECOG 1 | Squamous cell carcinoma | no ACA         |
| 114 | negative | negative | 65,7 | male   | ECOG 1 | Squamous cell carcinoma | no ACA         |
| 115 | negative | negative | 70,7 | male   | ECOG 1 | Squamous cell carcinoma | no ACA         |
| 116 | negative | negative | 72,3 | male   | ECOG 1 | Squamous cell carcinoma | no ACA         |
| 117 | negative | negative | 74,8 | male   | ECOG 1 | Squamous cell carcinoma | no ACA         |
| 118 | negative | negative | 63,2 | male   | ECOG 1 | Squamous cell carcinoma | no ACA         |
| 119 | negative | negative | 60,2 | male   | ECOG 1 | Squamous cell carcinoma | no ACA         |
| 120 | negative | negative | 52,7 | male   | ECOG 1 | Squamous cell carcinoma | no ACA         |
| 121 | negative | negative | 75,1 | male   | ECOG 1 | Squamous cell carcinoma | no ACA         |
| 122 | negative | negative | 75,3 | male   | ECOG 1 | Squamous cell carcinoma | no ACA         |
| 123 | negative | negative | 75,8 | male   | ECOG 1 | Squamous cell carcinoma | no ACA         |
| 124 | negative | negative | 62,3 | male   | ECOG 1 | Squamous cell carcinoma | no ACA         |
| 125 | negative | negative | 57,3 | male   | ECOG 1 | Squamous cell carcinoma | no ACA         |
| 126 | negative | negative | 68,2 | male   | ECOG 1 | Squamous cell carcinoma | no ACA         |
| 127 | negative | negative | 58,8 | male   | ECOG 1 | Squamous cell carcinoma | no ACA         |
| 128 | negative | negative | 64,1 | male   | ECOG 1 | Squamous cell carcinoma | no ACA         |
| 129 | negative | negative | 81,7 | male   | ECOG 1 | Squamous cell carcinoma | no ACA         |
| 130 | negative | negative | 58,4 | female | ECOG 1 | Squamous cell carcinoma | no ACA         |
| 131 | negative | negative | 71,9 | female | ECOG 1 | Squamous cell carcinoma | no ACA         |
| 132 | negative | negative | 72,8 | male   | ECOG 1 | Squamous cell carcinoma | no ACA         |
| 133 | negative | negative | 64,7 | male   | ECOG 1 | Squamous cell carcinoma | no ACA         |
| 134 | negative | negative | 65   | male   | ECOG 1 | Squamous cell carcinoma | no ACA         |
| 135 | negative | negative | 49,3 | male   | ECOG 1 | Squamous cell carcinoma | no ACA         |
| 136 | negative | negative | 70,7 | male   | ECOG 1 | Squamous cell carcinoma | no ACA         |
| 137 | negative | negative | 72,2 | male   | ECOG 1 | Squamous cell carcinoma | no ACA         |
| 138 | negative | negative | 63,4 | male   | ECOG 1 | Squamous cell carcinoma | no ACA         |
| 139 | negative | negative | 81,5 | female | ECOG 1 | Squamous cell carcinoma | no ACA         |
| 140 | negative | negative | 49   | male   | ECOG 1 | Squamous cell carcinoma | no ACA         |
| 141 | negative | negative | 74,7 | male   | ECOG 1 | Squamous cell carcinoma | no ACA         |
| 142 | negative | negative | 80,3 | female | ECOG 1 | Squamous cell carcinoma | no ACA         |
| 143 | negative | negative | 79,6 | male   | ECOG 1 | Squamous cell carcinoma | no ACA         |
| 144 | negative | negative | 63,6 | male   | ECOG 1 | Squamous cell carcinoma | no ACA         |
| 145 | negative | negative | 69,7 | male   | ECOG 1 | Squamous cell carcinoma | no ACA         |
| 146 | negative | negative | 77   | male   | ECOG 1 | Squamous cell carcinoma | no ACA         |

|     |          |          |      |        |        |                         |                |
|-----|----------|----------|------|--------|--------|-------------------------|----------------|
| 147 | negative | negative | 70,2 | male   | ECOG 1 | Squamous cell carcinoma | no ACA         |
| 148 | negative | negative | 45,4 | male   | ECOG 1 | Squamous cell carcinoma | no ACA         |
| 149 | negative | negative | 64,6 | male   | ECOG 1 | Squamous cell carcinoma | no ACA         |
| 150 | negative | negative | 71,1 | male   | ECOG 1 | Squamous cell carcinoma | no ACA         |
| 151 | negative | negative | 78,8 | male   | ECOG 1 | Squamous cell carcinoma | no ACA         |
| 152 | negative | negative | 47,2 | male   | ECOG 1 | Squamous cell carcinoma | no ACA         |
| 153 | negative | negative | 68,1 | male   | ECOG 1 | Squamous cell carcinoma | no ACA         |
| 154 | negative | negative | 64,6 | male   | ECOG 1 | Squamous cell carcinoma | no ACA         |
| 155 | negative | negative | 68,5 | female | ECOG 1 | Squamous cell carcinoma | no ACA         |
| 156 | negative | negative | 77,4 | female | ECOG 1 | Squamous cell carcinoma | no ACA         |
| 157 | negative | negative | 64,5 | male   | ECOG 1 | Squamous cell carcinoma | no ACA         |
| 158 | negative | negative | 66,7 | male   | ECOG 1 | Squamous cell carcinoma | no ACA         |
| 159 | negative | negative | 66   | male   | ECOG 1 | Squamous cell carcinoma | no ACA         |
| 160 | negative | negative | 61,9 | male   | ECOG 1 | Squamous cell carcinoma | no ACA         |
| 161 | negative | negative | 73,8 | female | ECOG 1 | Squamous cell carcinoma | no ACA         |
| 162 | negative | negative | 64,8 | male   | ECOG 1 | Squamous cell carcinoma | no ACA         |
| 163 | negative | negative | 62,6 | female | ECOG 1 | Squamous cell carcinoma | no ACA         |
| 164 | negative | negative | 78,8 | male   | ECOG 1 | Squamous cell carcinoma | no ACA         |
| 165 | negative | negative | 64,8 | male   | ECOG 1 | Squamous cell carcinoma | no ACA         |
| 166 | negative | negative | 69,9 | male   | ECOG 1 | Squamous cell carcinoma | no ACA         |
| 167 | negative | negative | 64,7 | male   | ECOG 1 | Squamous cell carcinoma | no ACA         |
| 168 | negative | negative | 82,8 | male   | ECOG 1 | no SCC                  | no ACA         |
| 169 | negative | negative | 64,5 | male   | ECOG 1 | no SCC                  | no ACA         |
| 170 | negative | negative | 58,8 | female | ECOG 1 | no SCC                  | no ACA         |
| 171 | negative | negative | 68,3 | male   | ECOG 1 | no SCC                  | no ACA         |
| 172 | negative | negative | 52,3 | male   | ECOG 1 | no SCC                  | no ACA         |
| 173 | negative | negative | 63,2 | male   | ECOG 1 | no SCC                  | no ACA         |
| 174 | negative | positive | 76,4 | female | ECOG 1 | no SCC                  | Adenocarcinoma |
| 175 | negative | positive | 64,4 | male   | ECOG 1 | no SCC                  | Adenocarcinoma |
| 176 | positive | negative | 66,6 | male   | ECOG 1 | no SCC                  | Adenocarcinoma |
| 177 | positive | negative | 72,6 | male   | ECOG 1 | no SCC                  | Adenocarcinoma |
| 178 | negative | negative | 55,6 | male   | ECOG 1 | no SCC                  | Adenocarcinoma |
| 179 | negative | negative | 61,5 | female | ECOG 1 | no SCC                  | Adenocarcinoma |
| 180 | negative | negative | 67,7 | male   | ECOG 1 | no SCC                  | Adenocarcinoma |
| 181 | negative | negative | 62,3 | male   | ECOG 1 | no SCC                  | Adenocarcinoma |
| 182 | negative | negative | 67,8 | male   | ECOG 1 | no SCC                  | Adenocarcinoma |
| 183 | negative | negative | 66,2 | male   | ECOG 1 | no SCC                  | Adenocarcinoma |
| 184 | negative | positive | 62,4 | male   | ECOG 1 | Squamous cell carcinoma | no ACA         |
| 185 | positive | negative | 63,9 | male   | ECOG 1 | Squamous cell carcinoma | no ACA         |
| 186 | negative | negative | 58,5 | male   | ECOG 1 | Squamous cell carcinoma | no ACA         |
| 187 | negative | negative | 71,9 | female | ECOG 1 | Squamous cell carcinoma | no ACA         |
| 188 | negative | negative | 84,4 | male   | ECOG 1 | Squamous cell carcinoma | no ACA         |
| 189 | negative | negative | 66,8 | male   | ECOG 1 | Squamous cell carcinoma | no ACA         |
| 190 | negative | negative | 69,2 | male   | ECOG 1 | Squamous cell carcinoma | no ACA         |
| 191 | negative | negative | 70,3 | male   | ECOG 1 | Squamous cell carcinoma | no ACA         |
| 192 | negative | negative | 63,4 | male   | ECOG 1 | Squamous cell carcinoma | no ACA         |
| 193 | negative | negative | 74,4 | male   | ECOG 1 | Squamous cell carcinoma | no ACA         |
| 194 | negative | negative | 69,1 | male   | ECOG 1 | Squamous cell carcinoma | no ACA         |
| 195 | negative | negative | 64   | male   | ECOG 1 | Squamous cell carcinoma | no ACA         |
| 196 | negative | negative | 70,1 | male   | ECOG 1 | Squamous cell carcinoma | no ACA         |

|     |          |          |      |        |        |                         |                |
|-----|----------|----------|------|--------|--------|-------------------------|----------------|
| 197 | negative | negative | 78,2 | male   | ECOG 1 | Squamous cell carcinoma | no ACA         |
| 198 | negative | negative | 59,3 | male   | ECOG 1 | Squamous cell carcinoma | no ACA         |
| 199 | negative | negative | 66   | male   | ECOG 1 | Squamous cell carcinoma | no ACA         |
| 200 | negative | negative | 66,1 | male   | ECOG 1 | Squamous cell carcinoma | no ACA         |
| 201 | negative | negative | 72,3 | male   | ECOG 1 | Squamous cell carcinoma | no ACA         |
| 202 | positive | negative | 52   | female | ECOG 1 | no SCC                  | no ACA         |
| 203 | positive | negative | 66,6 | male   | ECOG 1 | no SCC                  | no ACA         |
| 204 | negative | negative | 70   | female | ECOG 1 | no SCC                  | no ACA         |
| 205 | negative | negative | 64,3 | male   | ECOG 1 | no SCC                  | no ACA         |
| 206 | negative | negative | 69,7 | male   | ECOG 1 | no SCC                  | Adenocarcinoma |
| 207 | negative | negative | 77,9 | male   | ECOG 1 | no SCC                  | Adenocarcinoma |
| 208 | negative | negative | 70,9 | female | ECOG 1 | Squamous cell carcinoma | no ACA         |
| 209 | negative | negative | 67,8 | male   | ECOG 1 | Squamous cell carcinoma | no ACA         |
| 210 | negative | negative | 60,3 | male   | ECOG 1 | Squamous cell carcinoma | no ACA         |
| 211 | positive | negative | 62,3 | male   | ECOG 0 | no SCC                  | no ACA         |
| 212 | positive | negative | 71,2 | male   | ECOG 0 | no SCC                  | no ACA         |
| 213 | negative | negative | 42,9 | male   | ECOG 0 | no SCC                  | no ACA         |
| 214 | negative | negative | 61   | male   | ECOG 0 | no SCC                  | no ACA         |
| 215 | positive | positive | 83,2 | female | ECOG 0 | no SCC                  | Adenocarcinoma |
| 216 | positive | positive | 59,5 | male   | ECOG 0 | no SCC                  | Adenocarcinoma |
| 217 | negative | positive | 49   | male   | ECOG 0 | no SCC                  | Adenocarcinoma |
| 218 | negative | negative | 75,6 | female | ECOG 0 | no SCC                  | Adenocarcinoma |
| 219 | negative | negative | 77,4 | male   | ECOG 0 | no SCC                  | Adenocarcinoma |
| 220 | negative | negative | 65   | female | ECOG 0 | no SCC                  | Adenocarcinoma |
| 221 | negative | negative | 42,9 | female | ECOG 0 | no SCC                  | Adenocarcinoma |
| 222 | negative | negative | 77,2 | female | ECOG 0 | no SCC                  | Adenocarcinoma |
| 223 | negative | negative | 62,9 | male   | ECOG 0 | no SCC                  | Adenocarcinoma |
| 224 | negative | negative | 52,8 | female | ECOG 0 | no SCC                  | Adenocarcinoma |
| 225 | negative | negative | 58,3 | male   | ECOG 0 | no SCC                  | Adenocarcinoma |
| 226 | negative | negative | 49,1 | female | ECOG 0 | no SCC                  | Adenocarcinoma |
| 227 | negative | negative | 53   | male   | ECOG 0 | no SCC                  | Adenocarcinoma |
| 228 | negative | negative | 58,9 | male   | ECOG 0 | no SCC                  | Adenocarcinoma |
| 229 | negative | negative | 76,7 | female | ECOG 0 | no SCC                  | Adenocarcinoma |
| 230 | negative | negative | 73,3 | male   | ECOG 0 | no SCC                  | Adenocarcinoma |
| 231 | negative | negative | 66,9 | male   | ECOG 0 | no SCC                  | Adenocarcinoma |
| 232 | positive | negative | 54,6 | male   | ECOG 0 | Squamous cell carcinoma | no ACA         |
| 233 | negative | negative | 70,2 | male   | ECOG 0 | Squamous cell carcinoma | no ACA         |
| 234 | negative | negative | 74,4 | male   | ECOG 0 | Squamous cell carcinoma | no ACA         |
| 235 | negative | negative | 64,3 | male   | ECOG 0 | Squamous cell carcinoma | no ACA         |
| 236 | negative | negative | 70,2 | male   | ECOG 0 | Squamous cell carcinoma | no ACA         |
| 237 | negative | negative | 69,5 | male   | ECOG 0 | Squamous cell carcinoma | no ACA         |
| 238 | negative | negative | 65,2 | male   | ECOG 0 | Squamous cell carcinoma | no ACA         |
| 239 | negative | negative | 65,3 | male   | ECOG 0 | Squamous cell carcinoma | no ACA         |
| 240 | positive | positive | 53,1 | female | ECOG 0 | no SCC                  | Adenocarcinoma |
| 241 | negative | positive | 67,8 | female | ECOG 0 | no SCC                  | Adenocarcinoma |
| 242 | positive | negative | 73,8 | female | ECOG 0 | no SCC                  | Adenocarcinoma |
| 243 | positive | negative | 59,6 | female | ECOG 0 | no SCC                  | Adenocarcinoma |
| 244 | positive | negative | 71,5 | female | ECOG 0 | no SCC                  | Adenocarcinoma |
| 245 | negative | negative | 44,6 | male   | ECOG 0 | no SCC                  | Adenocarcinoma |
| 246 | negative | negative | 57,8 | female | ECOG 0 | no SCC                  | Adenocarcinoma |

|     |          |          |      |        |        |                         |                |
|-----|----------|----------|------|--------|--------|-------------------------|----------------|
| 247 | positive | negative | 63,7 | male   | ECOG 0 | Squamous cell carcinoma | no ACA         |
| 248 | positive | negative | 68,5 | male   | ECOG 0 | Squamous cell carcinoma | no ACA         |
| 249 | negative | negative | 63,6 | male   | ECOG 0 | Squamous cell carcinoma | no ACA         |
| 250 | negative | negative | 75,1 | male   | ECOG 0 | Squamous cell carcinoma | no ACA         |
| 251 | negative | negative | 53,8 | male   | ECOG 0 | Squamous cell carcinoma | no ACA         |
| 252 | negative | negative | 58,8 | male   | ECOG 0 | Squamous cell carcinoma | no ACA         |
| 253 | negative | negative | 75,6 | male   | ECOG 0 | Squamous cell carcinoma | no ACA         |
| 254 | negative | negative | 59,2 | male   | ECOG 0 | Squamous cell carcinoma | no ACA         |
| 255 | negative | negative | 73,9 | male   | ECOG 0 | Squamous cell carcinoma | no ACA         |
| 256 | negative | negative | 59,8 | male   | ECOG 0 | Squamous cell carcinoma | no ACA         |
| 257 | positive | negative | 49,1 | male   | ECOG 0 | no SCC                  | no ACA         |
| 258 | negative | negative | 74,5 | male   | ECOG 0 | no SCC                  | Adenocarcinoma |
| 259 | negative | negative |      | male   |        | no SCC                  | no ACA         |
| 260 | negative | negative | 66,7 | male   |        | no SCC                  | Adenocarcinoma |
| 261 | negative | negative | 64,4 | male   |        | no SCC                  | Adenocarcinoma |
| 262 | positive | negative | 60,9 | female |        | Squamous cell carcinoma | no ACA         |
| 263 | positive | negative | 57,2 | male   |        | Squamous cell carcinoma | no ACA         |
| 264 | negative | negative | 64,7 | male   |        | Squamous cell carcinoma | no ACA         |
| 265 | negative | negative | 67,2 | male   |        | Squamous cell carcinoma | no ACA         |
| 266 | negative | negative | 66   | female |        | no SCC                  | Adenocarcinoma |
| 267 | negative | negative | 72,4 | male   |        | Squamous cell carcinoma | no ACA         |
| 268 | positive | negative | 63,7 | female |        | no SCC                  | Adenocarcinoma |
| 269 | negative | negative | 73,5 | male   |        | no SCC                  | Adenocarcinoma |
| 270 | negative | negative | 56,4 | female |        | no SCC                  | Adenocarcinoma |

# Raw data: NSCLC stuyc collective; CD13 expression

| #  | Large Cell Carcinoma | pN | Stage   | Grading | Survival status | Overall Survival |
|----|----------------------|----|---------|---------|-----------------|------------------|
| 1  | Large Cell Carcinoma | 0  | Stage 1 | G3      | dead            | 1460             |
| 2  | no LCC               | 0  | Stage 1 | G3      | dead            | 854              |
| 3  | no LCC               | 0  | Stage 1 | G3      | dead            | 418              |
| 4  | no LCC               | 0  | Stage 1 | G3      | dead            | 2874             |
| 5  | no LCC               | 0  | Stage 1 | G3      | alive           | 1346             |
| 6  | no LCC               | 0  | Stage 1 | G3      | dead            | 2879             |
| 7  | no LCC               | 0  | Stage 1 | G2      | alive           | 3360             |
| 8  | no LCC               | 0  | Stage 1 | G3      | dead            | 801              |
| 9  | no LCC               | 0  | Stage 1 | G3      | dead            | 169              |
| 10 | no LCC               | 1  | Stage 3 | G3      | dead            | 79               |
| 11 | no LCC               | 1  | Stage 2 | G3      | dead            | 347              |
| 12 | no LCC               | 2  | Stage 3 | G3      | dead            | 227              |
| 13 | no LCC               | 2  | Stage 3 | G3      | dead            | 360              |
| 14 | no LCC               | 2  | Stage 3 | G3      | dead            | 2199             |
| 15 | Large Cell Carcinoma | 0  | Stage 2 | G4      | dead            | 62               |
| 16 | Large Cell Carcinoma | 0  | Stage 1 | G4      | alive           | 963              |
| 17 | Large Cell Carcinoma | 0  | Stage 1 | G3      | dead            | 2019             |
| 18 | Large Cell Carcinoma | 0  | Stage 1 |         | dead            | 2083             |
| 19 | Large Cell Carcinoma | 0  | Stage 1 | G4      | dead            | 684              |
| 20 | Large Cell Carcinoma | 0  | Stage 3 | G4      | alive           | 852              |
| 21 | Large Cell Carcinoma | 0  | Stage 1 | G3      | dead            | 1223             |
| 22 | Large Cell Carcinoma | 0  | Stage 1 | G4      | dead            | 2053             |
| 23 | Large Cell Carcinoma | 0  | Stage 1 | G4      | alive           | 1951             |
| 24 | Large Cell Carcinoma | 0  | Stage 1 | G4      | dead            | 306              |
| 25 | Large Cell Carcinoma | 0  | Stage 1 | G4      | dead            | 226              |
| 26 | Large Cell Carcinoma | 0  | Stage 1 | G4      | dead            | 151              |
| 27 | Large Cell Carcinoma | 0  | Stage 2 | G4      | dead            | 1257             |
| 28 | Large Cell Carcinoma | 0  | Stage 1 | G4      | alive           | 3202             |
| 29 | Large Cell Carcinoma | 0  | Stage 1 | G4      | alive           | 3025             |
| 30 | Large Cell Carcinoma | 0  | Stage 1 | G4      | alive           | 3748             |
| 31 | Large Cell Carcinoma | 0  | Stage 1 | G4      | dead            | 937              |
| 32 | Large Cell Carcinoma | 0  | Stage 1 | G4      | dead            | 51               |
| 33 | Large Cell Carcinoma | 0  | Stage 1 | G4      | dead            | 233              |
| 34 | Large Cell Carcinoma | 0  | Stage 1 | G4      | dead            | 264              |
| 35 | Large Cell Carcinoma | 0  | Stage 1 | G4      | dead            | 513              |
| 36 | Large Cell Carcinoma | 0  | Stage 1 |         | dead            | 507              |
| 37 | Large Cell Carcinoma | 0  | Stage 1 | G3      | dead            | 342              |
| 38 | no LCC               | 0  | Stage 1 | G3      | dead            | 1460             |
| 39 | no LCC               | 0  | Stage 1 | G3      | alive           | 2155             |
| 40 | no LCC               | 0  | Stage 1 | G2      | alive           | 2128             |
| 41 | no LCC               | 0  | Stage 1 | G2      | dead            | 1056             |
| 42 | no LCC               | 0  | Stage 1 | G2      | dead            | 941              |
| 43 | no LCC               | 0  | Stage 1 | G2      | alive           | 1040             |
| 44 | no LCC               | 0  | Stage 1 | G2      | dead            | 2727             |
| 45 | no LCC               | 0  | Stage 1 | G3      | dead            | 1963             |
| 46 | no LCC               | 0  | Stage 1 | G3      | dead            | 2096             |

|    |        |   |         |    |       |      |
|----|--------|---|---------|----|-------|------|
| 47 | no LCC | 0 | Stage 1 | G3 | dead  | 688  |
| 48 | no LCC | 0 | Stage 1 | G3 | dead  | 1324 |
| 49 | no LCC | 0 | Stage 1 | G3 | alive | 2644 |
| 50 | no LCC | 0 | Stage 1 | G2 | alive | 1982 |
| 51 | no LCC | 0 | Stage 1 | G2 | alive | 2394 |
| 52 | no LCC | 0 | Stage 1 | G2 | alive | 2521 |
| 53 | no LCC | 0 | Stage 1 | G3 | dead  | 403  |
| 54 | no LCC | 0 | Stage 1 | G2 | dead  | 2207 |
| 55 | no LCC | 0 | Stage 3 | G2 | dead  | 923  |
| 56 | no LCC | 0 | Stage 1 | G1 | alive | 2905 |
| 57 | no LCC | 0 | Stage 1 | G3 | alive | 2888 |
| 58 | no LCC | 0 | Stage 1 | G2 | dead  | 234  |
| 59 | no LCC | 0 | Stage 1 | G3 | alive | 2535 |
| 60 | no LCC | 0 | Stage 1 | G2 | alive | 3902 |
| 61 | no LCC | 0 | Stage 1 | G3 | dead  | 157  |
| 62 | no LCC | 0 | Stage 1 | G3 | alive | 3934 |
| 63 | no LCC | 0 | Stage 1 | G3 | alive | 3101 |
| 64 | no LCC | 0 | Stage 1 | G3 | alive | 2681 |
| 65 | no LCC | 0 | Stage 1 | G3 | alive | 2518 |
| 66 | no LCC | 0 | Stage 1 | G3 | alive | 936  |
| 67 | no LCC | 0 | Stage 1 | G2 | alive | 1173 |
| 68 | no LCC | 0 | Stage 1 | G3 | alive | 3137 |
| 69 | no LCC | 0 | Stage 1 | G2 | alive | 3051 |
| 70 | no LCC | 0 | Stage 1 | G2 | dead  | 1391 |
| 71 | no LCC | 0 | Stage 1 | G3 | alive | 2744 |
| 72 | no LCC | 0 | Stage 1 | G2 | alive | 2582 |
| 73 | no LCC | 0 | Stage 1 | G2 | dead  | 1930 |
| 74 | no LCC | 0 | Stage 1 | G2 | alive | 2464 |
| 75 | no LCC | 0 | Stage 1 | G3 | alive | 2590 |
| 76 | no LCC | 0 | Stage 1 | G2 | alive | 2562 |
| 77 | no LCC | 0 | Stage 1 | G2 | alive | 2653 |
| 78 | no LCC | 0 | Stage 1 | G2 | alive | 2748 |
| 79 | no LCC | 0 | Stage 1 | G2 | alive | 2118 |
| 80 | no LCC | 0 | Stage 1 | G2 | alive | 2161 |
| 81 | no LCC | 0 | Stage 1 | G2 | dead  | 185  |
| 82 | no LCC | 0 | Stage 1 | G2 | alive | 1138 |
| 83 | no LCC | 0 | Stage 1 | G2 | alive | 464  |
| 84 | no LCC | 0 | Stage 1 | G3 | dead  | 3596 |
| 85 | no LCC | 0 | Stage 1 | G2 | dead  | 246  |
| 86 | no LCC | 0 | Stage 3 | G3 | dead  | 647  |
| 87 | no LCC | 0 | Stage 1 | G2 | dead  | 1156 |
| 88 | no LCC | 0 | Stage 1 | G1 | dead  | 4002 |
| 89 | no LCC | 0 | Stage 1 | G3 | alive | 2841 |
| 90 | no LCC | 0 | Stage 1 | G2 | alive | 2926 |
| 91 | no LCC | 0 | Stage 1 | G1 | dead  | 2040 |
| 92 | no LCC | 0 | Stage 3 | G2 | dead  | 1321 |
| 93 | no LCC | 0 | Stage 1 | G3 | dead  | 225  |
| 94 | no LCC | 0 | Stage 1 | G3 | alive | 2911 |
| 95 | no LCC | 0 | Stage 1 | G3 | dead  | 1540 |
| 96 | no LCC | 0 | Stage 1 | G2 | alive | 3387 |



|     |        |   |         |    |       |      |
|-----|--------|---|---------|----|-------|------|
| 97  | no LCC | 0 | Stage 1 | G1 | dead  | 1256 |
| 98  | no LCC | 0 | Stage 1 | G2 | alive | 3715 |
| 99  | no LCC | 0 | Stage 1 | G3 | dead  | 3120 |
| 100 | no LCC | 0 | Stage 1 | G2 | alive | 2173 |
| 101 | no LCC | 0 | Stage 2 | G3 | alive | 2414 |
| 102 | no LCC | 0 | Stage 1 | G3 | alive | 1567 |
| 103 | no LCC | 0 | Stage 1 | G3 | alive | 2485 |
| 104 | no LCC | 0 | Stage 1 | G3 | dead  | 1662 |
| 105 | no LCC | 0 | Stage 1 | G2 | alive | 1482 |
| 106 | no LCC | 0 | Stage 1 | G2 | dead  | 522  |
| 107 | no LCC | 0 | Stage 1 | G3 | alive | 3106 |
| 108 | no LCC | 0 | Stage 2 | G3 | dead  | 470  |
| 109 | no LCC | 0 | Stage 1 | G2 | alive | 2808 |
| 110 | no LCC | 0 | Stage 1 | G2 | dead  | 299  |
| 111 | no LCC | 0 | Stage 1 | G3 | dead  | 876  |
| 112 | no LCC | 0 | Stage 1 | G3 | dead  | 293  |
| 113 | no LCC | 0 | Stage 1 | G3 | dead  | 499  |
| 114 | no LCC | 0 | Stage 1 | G3 | dead  | 1390 |
| 115 | no LCC | 0 | Stage 1 | G2 | dead  | 903  |
| 116 | no LCC | 0 | Stage 1 | G3 | alive | 2596 |
| 117 | no LCC | 0 | Stage 1 | G3 | dead  | 503  |
| 118 | no LCC | 0 | Stage 1 | G3 | alive | 2484 |
| 119 | no LCC | 0 | Stage 1 | G3 | alive | 3269 |
| 120 | no LCC | 0 | Stage 1 | G3 |       |      |
| 121 | no LCC | 0 | Stage 1 | G3 | alive | 2747 |
| 122 | no LCC | 0 | Stage 1 | G2 | dead  | 840  |
| 123 | no LCC | 0 | Stage 1 | G3 | dead  | 771  |
| 124 | no LCC | 0 | Stage 1 | G2 | dead  | 91   |
| 125 | no LCC | 0 | Stage 1 | G2 | dead  | 844  |
| 126 | no LCC | 0 | Stage 1 | G3 | alive | 1244 |
| 127 | no LCC | 0 | Stage 1 | G3 | alive | 2828 |
| 128 | no LCC | 0 | Stage 1 | G2 | dead  | 2135 |
| 129 | no LCC | 0 | Stage 1 | G3 | dead  | 1121 |
| 130 | no LCC | 0 | Stage 1 | G3 | dead  | 137  |
| 131 | no LCC | 0 | Stage 1 | G3 | dead  | 2141 |
| 132 | no LCC | 0 | Stage 1 | G3 | dead  | 378  |
| 133 | no LCC | 0 | Stage 1 | G3 | alive | 2950 |
| 134 | no LCC | 0 | Stage 1 | G3 | alive | 2717 |
| 135 | no LCC | 0 | Stage 1 | G3 | dead  | 1940 |
| 136 | no LCC | 0 | Stage 1 | G3 | alive | 1690 |
| 137 | no LCC | 0 | Stage 1 | G2 | dead  | 1934 |
| 138 | no LCC | 0 | Stage 3 | G3 | dead  | 382  |
| 139 | no LCC | 0 | Stage 1 | G3 | alive | 2558 |
| 140 | no LCC | 0 | Stage 1 | G3 | dead  | 787  |
| 141 | no LCC | 0 | Stage 1 | G3 | dead  | 669  |
| 142 | no LCC | 0 | Stage 2 | G2 | dead  | 1076 |
| 143 | no LCC | 0 | Stage 1 | G3 | dead  | 372  |
| 144 | no LCC | 0 | Stage 1 | G2 |       |      |
| 145 | no LCC | 0 | Stage 1 | G3 | alive | 1791 |
| 146 | no LCC | 0 | Stage 1 | G3 | dead  | 2873 |

|     |                      |   |         |    |       |      |
|-----|----------------------|---|---------|----|-------|------|
| 147 | no LCC               | 0 | Stage 1 | G2 | dead  | 1599 |
| 148 | no LCC               | 0 | Stage 1 | G3 | alive | 2349 |
| 149 | no LCC               | 0 | Stage 1 | G2 | dead  | 2217 |
| 150 | no LCC               | 0 | Stage 1 | G2 | alive | 2574 |
| 151 | no LCC               | 0 | Stage 1 | G2 | dead  | 765  |
| 152 | no LCC               | 0 | Stage 1 | G2 |       |      |
| 153 | no LCC               | 0 | Stage 1 | G4 | dead  | 287  |
| 154 | no LCC               | 0 | Stage 2 | G2 | dead  | 136  |
| 155 | no LCC               | 0 | Stage 1 | G3 | alive | 2656 |
| 156 | no LCC               | 0 | Stage 2 | G3 | dead  | 649  |
| 157 | no LCC               | 0 | Stage 1 | G3 | dead  | 785  |
| 158 | no LCC               | 0 | Stage 1 | G2 | alive | 3074 |
| 159 | no LCC               | 0 | Stage 1 | G3 | dead  | 1092 |
| 160 | no LCC               | 0 | Stage 1 | G3 |       |      |
| 161 | no LCC               | 0 | Stage 1 | G3 | dead  | 1054 |
| 162 | no LCC               | 0 | Stage 1 | G3 | dead  | 685  |
| 163 | no LCC               | 0 | Stage 1 | G3 | dead  | 286  |
| 164 | no LCC               | 0 | Stage 2 | G3 | dead  | 934  |
| 165 | no LCC               | 0 | Stage 1 | G3 | dead  | 1592 |
| 166 | no LCC               | 0 | Stage 1 | G3 | dead  | 1031 |
| 167 | no LCC               | 0 | Stage 1 | G2 | dead  | 1231 |
| 168 | Large Cell Carcinoma | 1 | Stage 2 | G4 | dead  | 713  |
| 169 | Large Cell Carcinoma | 1 | Stage 2 | G4 | dead  | 281  |
| 170 | Large Cell Carcinoma | 1 | Stage 2 | G3 | dead  | 1950 |
| 171 | Large Cell Carcinoma | 1 | Stage 2 |    | dead  | 434  |
| 172 | Large Cell Carcinoma | 1 | Stage 2 | G4 | alive | 4194 |
| 173 | Large Cell Carcinoma | 1 | Stage 2 | G4 | dead  | 249  |
| 174 | no LCC               | 1 | Stage 2 | G2 | dead  | 756  |
| 175 | no LCC               | 1 | Stage 2 | G2 | dead  | 608  |
| 176 | no LCC               | 1 | Stage 2 | G3 | dead  | 137  |
| 177 | no LCC               | 1 | Stage 2 | G2 | alive | 2232 |
| 178 | no LCC               | 1 | Stage 2 | G2 | dead  | 569  |
| 179 | no LCC               | 1 | Stage 2 | G3 | alive |      |
| 180 | no LCC               | 1 | Stage 2 | G3 | dead  | 337  |
| 181 | no LCC               | 1 | Stage 2 | G3 | alive | 2775 |
| 182 | no LCC               | 1 | Stage 2 | G2 | dead  | 900  |
| 183 | no LCC               | 1 | Stage 2 | G3 | dead  | 2116 |
| 184 | no LCC               | 1 | Stage 3 | G3 | dead  | 478  |
| 185 | no LCC               | 1 | Stage 2 | G2 | dead  | 128  |
| 186 | no LCC               | 1 | Stage 2 | G3 | dead  | 311  |
| 187 | no LCC               | 1 | Stage 2 | G2 | dead  | 1657 |
| 188 | no LCC               | 1 | Stage 2 | G3 | dead  | 882  |
| 189 | no LCC               | 1 | Stage 2 | G3 | dead  | 226  |
| 190 | no LCC               | 1 | Stage 2 | G3 | alive | 2897 |
| 191 | no LCC               | 1 | Stage 2 | G3 | alive | 2473 |
| 192 | no LCC               | 1 | Stage 2 | G3 | alive | 1118 |
| 193 | no LCC               | 1 | Stage 2 | G3 | dead  | 1322 |
| 194 | no LCC               | 1 | Stage 2 | G3 | dead  | 1241 |
| 195 | no LCC               | 1 | Stage 2 | G3 | dead  | 156  |
| 196 | no LCC               | 1 | Stage 3 | G3 | dead  | 920  |

|     |                      |   |         |    |       |      |
|-----|----------------------|---|---------|----|-------|------|
| 197 | no LCC               | 1 | Stage 2 | G2 | dead  | 1068 |
| 198 | no LCC               | 1 | Stage 3 | G2 | alive | 4025 |
| 199 | no LCC               | 1 | Stage 3 | G3 | alive | 811  |
| 200 | no LCC               | 1 | Stage 2 | G2 | dead  | 40   |
| 201 | no LCC               | 1 | Stage 2 | G3 | alive | 1495 |
| 202 | Large Cell Carcinoma | 2 | Stage 3 | G4 | dead  | 80   |
| 203 | Large Cell Carcinoma | 2 | Stage 3 | G4 | dead  | 277  |
| 204 | Large Cell Carcinoma | 2 | Stage 3 | G4 | dead  | 511  |
| 205 | Large Cell Carcinoma | 2 | Stage 3 | G4 | dead  | 2498 |
| 206 | no LCC               | 2 | Stage 3 | G3 | dead  | 1362 |
| 207 | no LCC               | 2 | Stage 3 | G2 | dead  | 1277 |
| 208 | no LCC               | 2 | Stage 3 | G3 | dead  | 509  |
| 209 | no LCC               | 2 | Stage 3 | G3 | dead  | 838  |
| 210 | no LCC               | 2 | Stage 3 | G2 | dead  | 1055 |
| 211 | Large Cell Carcinoma | 0 | Stage 1 | G4 | dead  | 540  |
| 212 | Large Cell Carcinoma | 0 | Stage 1 | G3 | alive | 3422 |
| 213 | Large Cell Carcinoma | 0 | Stage 1 | G2 | alive | 3571 |
| 214 | Large Cell Carcinoma | 0 | Stage 1 | G4 | dead  | 1742 |
| 215 | no LCC               | 0 | Stage 1 | G2 | alive | 2497 |
| 216 | no LCC               | 0 | Stage 1 | G1 | dead  | 2419 |
| 217 | no LCC               | 0 | Stage 1 | G2 | dead  | 610  |
| 218 | no LCC               | 0 | Stage 1 | G3 | dead  | 353  |
| 219 | no LCC               | 0 | Stage 1 | G3 | dead  | 460  |
| 220 | no LCC               | 0 | Stage 1 | G2 | alive | 2770 |
| 221 | no LCC               | 0 | Stage 1 | G2 | dead  | 1033 |
| 222 | no LCC               | 0 | Stage 1 | G2 | dead  | 763  |
| 223 | no LCC               | 0 | Stage 1 | G2 | dead  | 2740 |
| 224 | no LCC               | 0 | Stage 1 | G2 | alive | 2627 |
| 225 | no LCC               | 0 | Stage 1 | G3 | alive | 3711 |
| 226 | no LCC               | 0 | Stage 1 | G2 | alive | 3745 |
| 227 | no LCC               | 0 | Stage 1 | G2 | dead  | 311  |
| 228 | no LCC               | 0 | Stage 1 | G2 | dead  | 1194 |
| 229 | no LCC               | 0 | Stage 1 | G2 | alive | 2587 |
| 230 | no LCC               | 0 | Stage 1 | G1 | dead  | 810  |
| 231 | no LCC               | 0 | Stage 2 | G3 | alive | 2678 |
| 232 | no LCC               | 0 | Stage 1 | G2 | alive | 2894 |
| 233 | no LCC               | 0 | Stage 1 | G3 | dead  | 527  |
| 234 | no LCC               | 0 | Stage 1 | G3 | dead  | 844  |
| 235 | no LCC               | 0 | Stage 1 | G3 | dead  | 2408 |
| 236 | no LCC               | 0 | Stage 1 | G3 | alive | 3180 |
| 237 | no LCC               | 0 | Stage 1 | G3 | dead  | 1620 |
| 238 | no LCC               | 0 | Stage 1 | G3 | dead  | 1028 |
| 239 | no LCC               | 0 | Stage 1 | G3 | dead  | 2595 |
| 240 | no LCC               | 1 | Stage 2 | G2 | alive | 3365 |
| 241 | no LCC               | 1 | Stage 2 | G3 | dead  | 1597 |
| 242 | no LCC               | 1 | Stage 2 | G2 | dead  | 2605 |
| 243 | no LCC               | 1 | Stage 2 | G3 | alive | 2268 |
| 244 | no LCC               | 1 | Stage 2 | G3 | dead  | 667  |
| 245 | no LCC               | 1 | Stage 2 | G3 | dead  | 2612 |
| 246 | no LCC               | 1 | Stage 2 | G2 | dead  | 269  |

|     |                      |   |         |    |       |      |
|-----|----------------------|---|---------|----|-------|------|
| 247 | no LCC               | 1 | Stage 2 | G3 | dead  | 884  |
| 248 | no LCC               | 1 | Stage 2 | G3 | alive | 1059 |
| 249 | no LCC               | 1 | Stage 2 | G3 | dead  | 614  |
| 250 | no LCC               | 1 | Stage 2 |    | dead  | 438  |
| 251 | no LCC               | 1 | Stage 2 | G2 | alive | 2948 |
| 252 | no LCC               | 1 | Stage 2 | G3 | dead  | 802  |
| 253 | no LCC               | 1 | Stage 2 | G3 | dead  | 582  |
| 254 | no LCC               | 1 | Stage 2 | G3 | alive | 4034 |
| 255 | no LCC               | 1 | Stage 2 | G3 | dead  | 1316 |
| 256 | no LCC               | 1 | Stage 2 | G2 | dead  | 776  |
| 257 | Large Cell Carcinoma | 2 | Stage 3 | G4 | dead  | 180  |
| 258 | no LCC               | 2 | Stage 3 | G2 | dead  | 1205 |
| 259 | Large Cell Carcinoma | 0 | Stage 1 |    |       |      |
| 260 | no LCC               | 0 | Stage 1 | G2 | alive | 1531 |
| 261 | no LCC               | 0 | Stage 1 | G3 | alive | 1431 |
| 262 | no LCC               | 0 | Stage 1 | G2 | alive | 1416 |
| 263 | no LCC               | 0 | Stage 1 | G2 | dead  | 1157 |
| 264 | no LCC               | 0 | Stage 1 | G3 | dead  | 28   |
| 265 | no LCC               | 0 | Stage 1 | G2 | dead  | 506  |
| 266 | no LCC               | 1 | Stage 2 | G3 | alive | 1237 |
| 267 | no LCC               | 1 | Stage 2 | G3 | dead  | 197  |
| 268 | no LCC               | 2 | Stage 3 | G2 | dead  | 797  |
| 269 | no LCC               | 2 | Stage 3 | G2 | dead  | 1287 |
| 270 | no LCC               | 2 | Stage 3 | G3 | dead  | 157  |

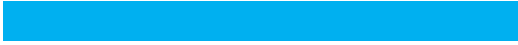

Supplement: pone.0177146.s005.pdf [file pone.0177146.s005.pdf]
