# Supplementary material for: Potential therapeutic impact of CD13 expression in non-small cell lung cancer
Source: PubMed Central journal article supplement (PMC5467809; doi:10.1371/journal.pone.0177146), 2017-06-12
Supplement: pone.0177146.s002.pdf [file pone.0177146.s002.pdf]

Raw data:

# FACS A549 anti-CD-13-PE

unstained cells

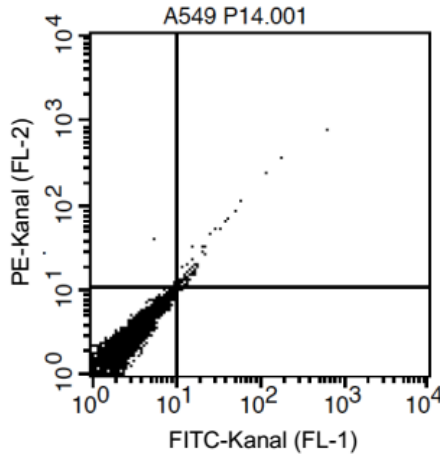

Isotype control (PE)

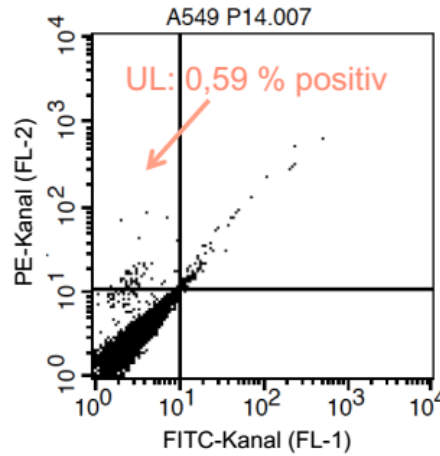

m-anti-CD13 (PE)

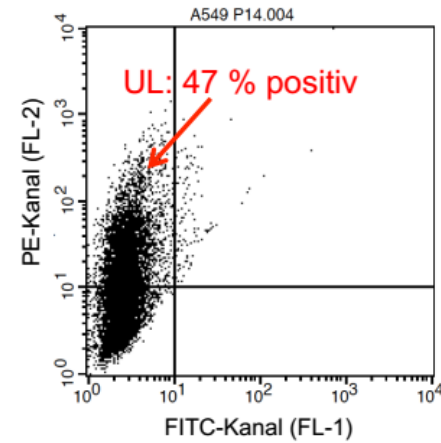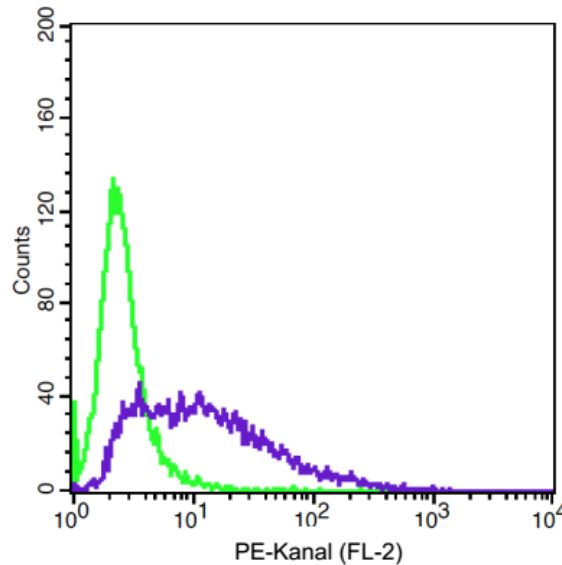

unstained cells

m-anti-CD13 (PE) stained cells
