# Supplementary material for: Potential therapeutic impact of CD13 expression in non-small cell lung cancer
Source: PubMed Central journal article supplement (PMC5467809; doi:10.1371/journal.pone.0177146), 2017-06-12
Supplement: pone.0177146.s003.pdf [file pone.0177146.s003.pdf]

**S1 Table. The prognostic impact of CD13 in lung cancer with regard to univariate analyses.**

| Author                                    | Study patients (n) | Mab Clone              | Study population                        | Prognostic value of CD 13 | Log rank test p-value |
|-------------------------------------------|--------------------|------------------------|-----------------------------------------|---------------------------|-----------------------|
| Tokuhara <i>et al.</i> 2006 <sup>16</sup> | 194                | MH8-11                 | n = 194 NSCLC patients                  | poor                      | 0.006                 |
|                                           |                    |                        | n = 122 patients with ACA <sup>#1</sup> | poor                      | 0.0172                |
|                                           |                    |                        | n = 63 patients with SCC <sup>#2</sup>  | poor                      | 0.0198                |
| Ito <i>et al.</i> 2009 <sup>11</sup>      | 95                 | 13C03 <sup>IHC#3</sup> | n = 95 NSCLC patients                   | c.n.s. <sup>#5</sup>      | 0.598                 |
|                                           |                    |                        | n = 50 patients with ACA <sup>#1</sup>  | c.n.s. <sup>#5</sup>      | 0.983                 |
|                                           |                    |                        | n = 34 patients with SCC <sup>#2</sup>  | c.n.s. <sup>#5</sup>      | 0.241                 |
|                                           |                    | 13C03 <sup>IHC#4</sup> | n = 95 NSCLC patients                   | c.n.s. <sup>#5</sup>      | 0.518                 |
|                                           |                    |                        | n = 50 patients with ACA <sup>#1</sup>  | c.n.s. <sup>#5</sup>      | ---                   |
|                                           |                    |                        | n = 34 patients with SCC <sup>#2</sup>  | c.n.s. <sup>#5</sup>      | 0.360                 |
| Zhang <i>et al.</i> 2015 <sup>15</sup>    | 127                | 38C12                  | n = 58 patients with ACA <sup>#1</sup>  | poor                      | 0.016                 |
|                                           |                    |                        | n = 69 patients with SCC <sup>#2</sup>  | poor                      | 0.001                 |
| Schmidt <i>et al.</i> 2017                | 270                | 38C12 <sup>IHC#3</sup> | n = 270 NSCLC patients                  | c.n.s. <sup>#5</sup>      | 0.810                 |
|                                           |                    |                        | n = 107 patients with ACA <sup>#1</sup> | c.n.s. <sup>#5</sup>      | 0.321                 |
|                                           |                    |                        | n = 123 patients with SCC <sup>#2</sup> | borderline good           | 0.047                 |
|                                           |                    | 38C12 <sup>IHC#4</sup> | n = 270 NSCLC patients                  | c.n.s. <sup>#5</sup>      | 0.702                 |
|                                           |                    |                        | n = 107 patients with ACA <sup>#1</sup> | c.n.s. <sup>#5</sup>      | 0.491                 |
|                                           |                    |                        | n = 123 patients with SCC <sup>#2</sup> | c.n.s. <sup>#5</sup>      | 0.456                 |

- #1 ACA = Adenocarcinoma  
#2 SCC = Squamous cell carcinoma  
#3 IHC = Immunohistochemical expression of CD13 in stroma cells  
#4 IHC = Immunohistochemical expression of CD13 in tumor cells  
#5 c.n.s. = Clinically not significant
