# Supplementary material for: Potential therapeutic impact of CD13 expression in non-small cell lung cancer
Source: PLoS One. 2017 Jun 12;12(6):e0177146. doi: 10.1371/journal.pone.0177146 (PMC5467809; doi:10.1371/journal.pone.0177146)
Supplement: S2 Table — (PDF) [file pone.0177146.s004.pdf]

# Raw data: Mouse trial A549 Xenotransplants tTF-NGR vs. PBS

| A       | B      | C        | D           | E          | F       | G           | H          | I      | J           | K          | L      | M           | N          | O      | P           | Q          |
|---------|--------|----------|-------------|------------|---------|-------------|------------|--------|-------------|------------|--------|-------------|------------|--------|-------------|------------|
| Day     |        |          |             | 0          |         |             | 1          |        |             | 2          |        |             | 3          |        |             | 4          |
| Therapy |        |          | Therapy     |            |         | Therapy     |            |        | Therapy     |            |        | Therapy     |            |        | Therapy     |            |
|         | weight | length   | width       | volume     | length  | width       | volume     | length | width       | volume     | length | width       | volume     | length | width       | volume     |
| PBS     | 39     | 17,6     | 14          | 1793,792   | 18,4    | 14,4        | 1984,02048 | 18,8   | 14          | 1916,096   | 19,1   | 14,5        | 2088,203   | 19,8   | 14,9        | 2285,81496 |
| PBS     | 35     | 13,4     | 9,8         | 669,20672  | 13,8    | 9,6         | 661,34016  | 13,4   | 9,6         | 642,17088  | 13,9   | 9,8         | 694,17712  | 14,3   | 10,2        | 773,64144  |
| PBS     | 26     | 8,4      | 6,7         | 196,07952  | 7,8     | 6,7         | 182,07384  | 7,6    | 6,4         | 161,87392  | 8,6    | 6,8         | 206,78528  | 8,8    | 6,7         | 205,41664  |
| PBS     | 34     | 12,8     | 10,4        | 719,91296  | 12,7    | 11,5        | 873,379    | 13,3   | 10,4        | 748,03456  | 13,2   | 10,5        | 756,756    | 13,5   | 10,7        | 803,7198   |
| PBS     | 35     | 15,8     | 11,9        | 1163,46776 | 16,4    | 12,1        | 1248,58448 | 16,6   | 12,1        | 1263,81112 | 16,8   | 12,1        | 1279,03776 | 16,8   | 13          | 1476,384   |
| PBS     | 30     | 16,2     | 11,6        | 1133,53344 | 16,5    | 11,7        | 1174,5162  | 16,5   | 11,6        | 1154,5248  | 16,1   | 12,6        | 1329,13872 | 16,7   | 11,5        | 1148,459   |
|         |        |          | 203,5328863 | 945,9987   |         | 227,1632979 | 1020,6524  |        | 225,1260804 | 981,0852   |        | 243,3200599 | 1059,0163  |        | 265,7947475 | 1115,5726  |
| TTF-NGR | 36     | 8,3      | 7,2         | 223,74144  | 8,4     | 7,1         | 220,19088  | 8,7    | 7,4         | 247,73424  | 8,1    | 6,9         | 200,53332  | 8,3    | 7           | 211,484    |
| TTF-NGR | 35     | 14       | 10,4        | 787,4048   | 13,8    | 12,2        | 1068,07584 | 14,1   | 10,2        | 762,82128  | 14,8   | 12,5        | 1202,5     | 14,8   | 12,9        | 1280,69136 |
| TTF-NGR | 29     | 18,3     | 13,2        | 1658,06784 | 18,6    | 13,5        | 1762,722   | 18,4   | 13          | 1616,992   | 18,2   | 13,6        | 1750,46144 | 18     | 12,9        | 1557,5976  |
| TTF-NGR | 33     | 14,2     | 11,9        | 1045,64824 | 14,2    | 10,7        | 845,39416  | 14,4   | 12          | 1078,272   | 14,4   | 10,4        | 809,90208  | 14,5   | 10,2        | 784,4616   |
|         |        |          | 257,7044384 | 928,7156   |         | 275,6469971 | 974,0957   |        | 248,4109013 | 926,4549   |        | 282,7485485 | 990,8492   |        | 256,3015146 | 958,5586   |
|         |        |          |             |            |         |             |            |        |             |            |        |             |            |        |             |            |
|         |        |          |             |            |         |             |            |        |             |            |        |             |            |        |             |            |
| Day     |        |          | 5           |            |         | 6           |            |        |             | 8          |        |             |            |        |             |            |
| Therapy |        |          |             |            |         |             |            |        |             |            |        |             |            |        |             |            |
|         | length | width    | volume      | length     | width   | volume      | weight     | length | width       | volume     |        |             |            |        |             |            |
| PBS     | 20,2   | 15,3     | 2458,88136  | 20,2       | 15,5    | 2523,586    | 39         | 20,4   | 15,8        | 2648,18112 |        |             |            |        |             |            |
| PBS     | 13,5   | 12       | 1010,88     | 14,3       | 10,4    | 804,27776   | 35         | 14,3   | 10,8        | 867,33504  |        |             |            |        |             |            |
| PBS     | 8,5    | 7        | 216,58      | 9          | 7,4     | 256,2768    | 26         | 9,3    | 7,2         | 250,69824  |        |             |            |        |             |            |
| PBS     | 14,4   | 10,7     | 857,30112   | 14,1       | 11,9    | 1038,28452  | 34         | 14,2   | 11,8        | 1028,14816 |        |             |            |        |             |            |
| PBS     | 17,9   | 13       | 1573,052    | 17,7       | 13,3    | 1628,09556  | 35         | 17,7   | 14          | 1803,984   |        |             |            |        |             |            |
| PBS     | 17,9   | 12,3     | 1408,20732  | 17,8       | 12,4    | 1423,20256  | 30         | 17,2   | 12,2        | 1331,22496 |        |             |            |        |             |            |
|         |        | 282,3527 | 1254,1503   |            | 289,68  | 1278,9539   |            |        | 308,7567204 | 1321,5953  |        |             |            |        |             |            |
| TTF-NGR | 8,3    | 6,9      | 205,48476   | 8,1        | 7,1     | 212,32692   | 36         | 8,4    | 6,9         | 207,96048  |        |             |            |        |             |            |
| TTF-NGR | 15,3   | 12,8     | 1303,51104  | 15,4       | 13      | 1353,352    | 35         | 15,3   | 12,7        | 1283,22324 |        |             |            |        |             |            |
| TTF-NGR | 18     | 13,4     | 1680,6816   | 18,1       | 13,5    | 1715,337    | 29         | 14,3   | 12,6        | 1180,53936 |        |             |            |        |             |            |
| TTF-NGR | 14,8   | 10,1     | 785,06896   | 15,1       | 10,3    | 833,01868   | 33         | 14,8   | 10,3        | 816,46864  |        |             |            |        |             |            |
|         |        | 277,5717 | 993,6866    |            | 283,022 | 1028,5087   |            |        | 210,4063474 | 872,0479   |        |             |            |        |             |            |
